# Supplementary material for: A multivariate Poisson-log normal mixture model for clustering transcriptome sequencing data
Source: PubMed Central journal article supplement (PMC6636065; doi:10.1186/s12859-019-2916-0), 2019-07-16
Supplement: 12859_2019_2916_MOESM1_ESM.pdf [file 12859_2019_2916_MOESM1_ESM.pdf]

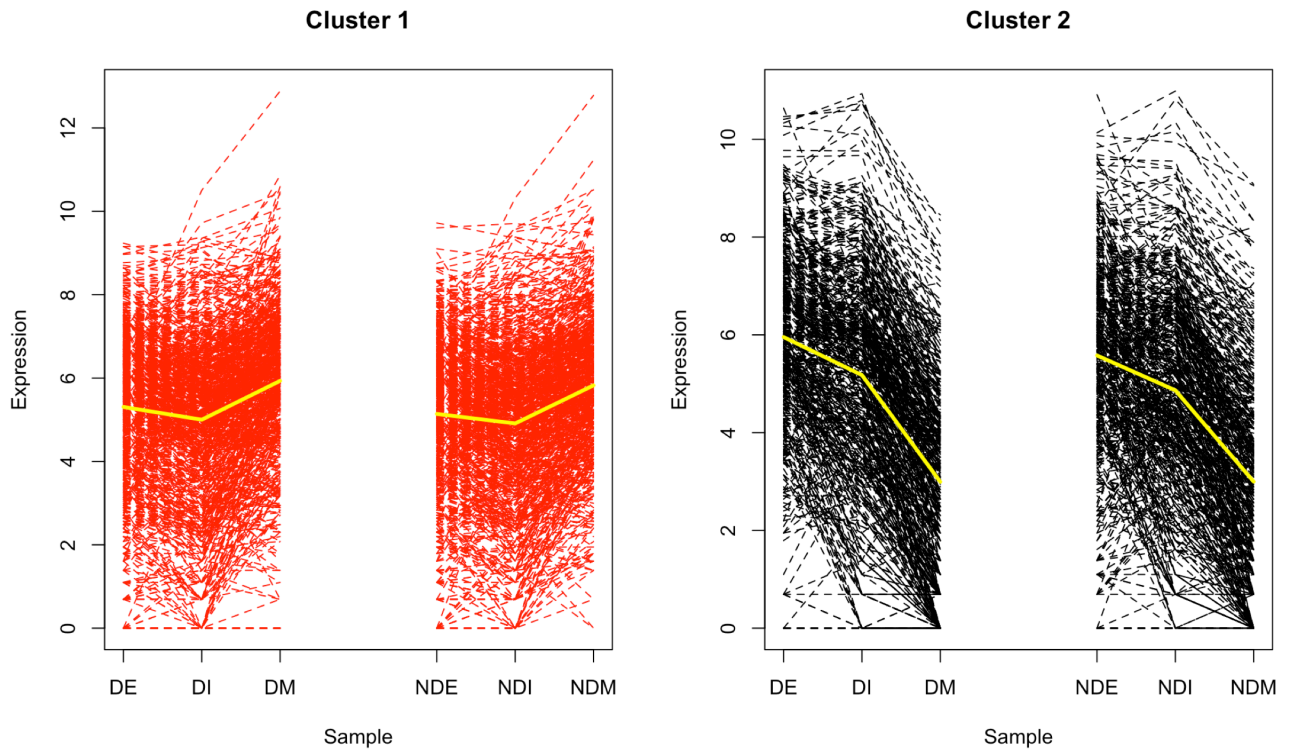

Figure 1: The expression patterns for the  $G = 2$  model for the cranberry bean RNA-seq dataset clustered using mixtures of `MBCluster.Seq,NB.` in  $T_1$ .

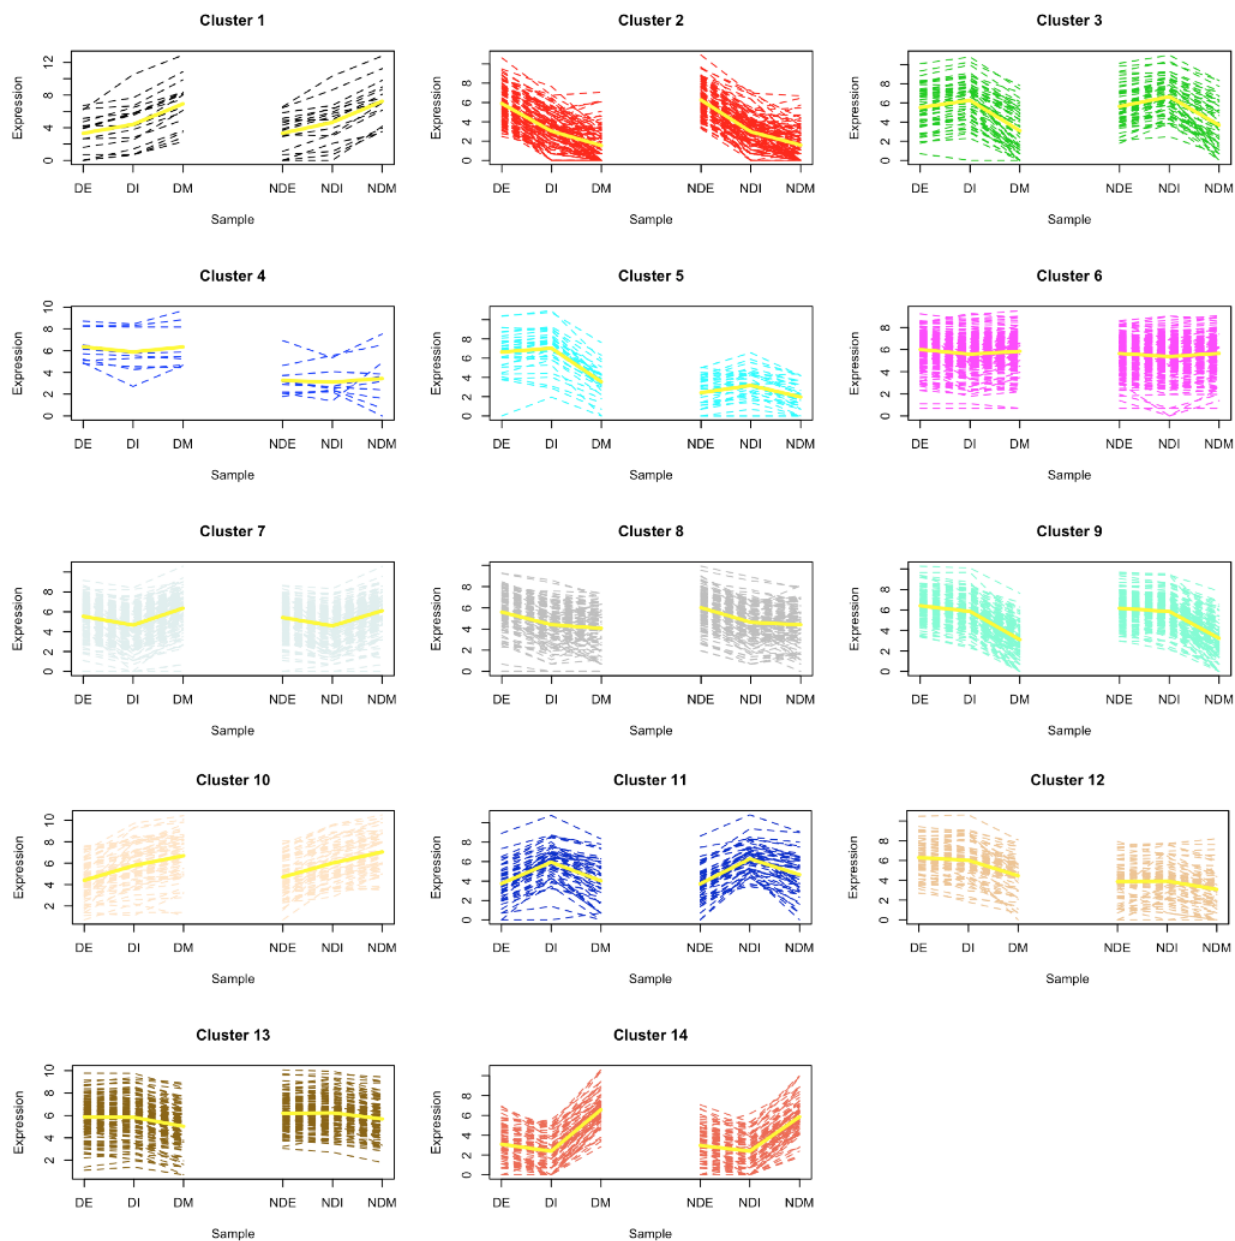

Figure 2: The expression patterns for the  $G = 14$  model for the cranberry bean RNA-seq dataset clustered using mixtures of `MBCluster.Seq,Poisson` in  $T_2$ .
