# Supplementary material for: A multivariate Poisson-log normal mixture model for clustering transcriptome sequencing data
Source: PubMed Central journal article supplement (PMC6636065; doi:10.1186/s12859-019-2916-0), 2019-07-16
Supplement: 12859_2019_2916_MOESM3_ESM.pdf [file 12859_2019_2916_MOESM3_ESM.pdf]

# 1 Parameter Estimation Results

Table 1: Model parameters ( $\vartheta_g$ ) and the norms of the associated biases from the 50 runs for  $G = 1$ .

| $\vartheta_g$ | True                                                                                                                                                                                                                                                                                                           | $\ \text{Bias}\ $ |
|---------------|----------------------------------------------------------------------------------------------------------------------------------------------------------------------------------------------------------------------------------------------------------------------------------------------------------------|-------------------|
| $\mu_1$       | $(4.5, 5, 5, 5, 5, 6)'$                                                                                                                                                                                                                                                                                        | 0.06              |
| $\Sigma_1$    | $\begin{bmatrix} 0.97 & -0.28 & -0.40 & -0.04 & -0.42 & -0.30 \\ -0.28 & 1.00 & 0.08 & 0.18 & 0.68 & -0.59 \\ -0.40 & 0.08 & 0.97 & -0.35 & -0.01 & 0.03 \\ -0.04 & 0.18 & -0.35 & 0.90 & 0.66 & 0.30 \\ -0.42 & 0.68 & -0.01 & 0.66 & 1.06 & 0.16 \\ -0.30 & -0.59 & 0.03 & 0.30 & 0.16 & 1.02 \end{bmatrix}$ | 0.04              |

Table 2: Model parameters ( $\vartheta_g$ ) and the norms of the associated biases from the 50 runs for  $G = 2$ .

| $\vartheta_g$ | True                                                                                                                                                                                                                                                                                                           | $\ \text{Bias}\ $ |
|---------------|----------------------------------------------------------------------------------------------------------------------------------------------------------------------------------------------------------------------------------------------------------------------------------------------------------------|-------------------|
| $\mu_1$       | $(6.5, 6, 6, 6, 6, 6)'$                                                                                                                                                                                                                                                                                        | 0.11              |
| $\mu_2$       | $(2, 2.5, 2, 2, 2, 2)'$                                                                                                                                                                                                                                                                                        | 0.13              |
| $\Sigma_1$    | $\begin{bmatrix} 1.24 & -0.36 & -0.51 & -0.04 & -0.54 & -0.39 \\ -0.36 & 1.30 & 0.11 & 0.23 & 0.90 & -0.77 \\ -0.51 & 0.11 & 1.25 & -0.44 & -0.01 & 0.04 \\ -0.04 & 0.23 & -0.44 & 1.09 & 0.84 & 0.38 \\ -0.54 & 0.90 & -0.01 & 0.84 & 1.41 & 0.21 \\ -0.39 & -0.77 & 0.04 & 0.38 & 0.21 & 1.33 \end{bmatrix}$ | 0.05              |
| $\Sigma_2$    | $\begin{bmatrix} 0.70 & 0.26 & -0.45 & -0.30 & -0.04 & -0.14 \\ 0.26 & 0.70 & 0.19 & 0.27 & -0.07 & -0.05 \\ -0.45 & 0.19 & 0.70 & 0.29 & 0.09 & 0.13 \\ -0.30 & 0.27 & 0.29 & 0.70 & 0.25 & -0.04 \\ -0.04 & -0.07 & 0.09 & 0.25 & 0.70 & 0.02 \\ -0.14 & -0.05 & 0.13 & -0.04 & 0.02 & 0.70 \end{bmatrix}$   | 0.15              |

Table 3: Model parameters ( $\boldsymbol{\vartheta}_g$ ) and the norms of the associated biases from the 30 runs for  $G = 3$ .

| $\boldsymbol{\vartheta}_g$ | True                                                                                                                                                                                                                                                                                                             | $\ \text{Bias}\ $ |
|----------------------------|------------------------------------------------------------------------------------------------------------------------------------------------------------------------------------------------------------------------------------------------------------------------------------------------------------------|-------------------|
| $\boldsymbol{\mu}_1$       | $(3, 3, 3, 3, 3, 3)'$                                                                                                                                                                                                                                                                                            | 0.15              |
| $\boldsymbol{\mu}_2$       | $(6.5, 6.5, 6.5, 6.5, 6, 6.5)'$                                                                                                                                                                                                                                                                                  | 0.13              |
| $\boldsymbol{\mu}_3$       | $(1, -1, 1, 1, -1, 1)'$                                                                                                                                                                                                                                                                                          | 0.73              |
| $\Sigma_1$                 | $\begin{bmatrix} 1.00 & -0.29 & -0.41 & -0.04 & -0.41 & -0.31 \\ -0.29 & 1.00 & 0.08 & 0.19 & 0.66 & -0.59 \\ -0.41 & 0.08 & 1.00 & -0.38 & -0.01 & 0.03 \\ -0.04 & 0.19 & -0.38 & 1.00 & 0.67 & 0.31 \\ -0.41 & 0.66 & -0.01 & 0.67 & 1.00 & 0.15 \\ -0.31 & -0.59 & 0.03 & 0.31 & 0.15 & 1.00 \end{bmatrix}$   | 1.55              |
| $\Sigma_2$                 | $\begin{bmatrix} 1.50 & -0.03 & 0.67 & 0.66 & -0.65 & -1.06 \\ -0.03 & 1.50 & -0.01 & 0.52 & 0.14 & -0.58 \\ 0.67 & -0.01 & 1.50 & 0.64 & 0.28 & -0.44 \\ 0.66 & 0.52 & 0.64 & 1.50 & 0.56 & -0.96 \\ -0.65 & 0.14 & 0.28 & 0.56 & 1.50 & 0.41 \\ -1.06 & -0.58 & -0.44 & -0.96 & 0.41 & 1.50 \end{bmatrix}$     | 0.12              |
| $\Sigma_3$                 | $\begin{bmatrix} 0.50 & 0.30 & -0.09 & -0.06 & 0.04 & -0.04 \\ 0.30 & 0.50 & -0.02 & -0.02 & -0.07 & -0.17 \\ -0.09 & -0.02 & 0.50 & 0.09 & 0.26 & 0.13 \\ -0.06 & -0.02 & 0.09 & 0.50 & -0.01 & 0.19 \\ 0.04 & -0.07 & 0.26 & -0.01 & 0.50 & -0.10 \\ -0.04 & -0.17 & 0.13 & 0.19 & -0.10 & 0.50 \end{bmatrix}$ | 0.20              |
